# Supplementary material for: A structural model for the full-length blue light-sensing protein YtvA from Bacillus subtilis, based on EPR spectroscopy
Source: Royal Society of Chemistry journal article supplement (doi:10.1039/c3pp50128k), 2013-07-11
Supplement: c3pp50128k.pdf [file c3pp50128k.pdf]

## Supplementary Information

### Parameters for label mobility simulations

For all simulations of spin label mobility, a spin label g-tensor  $g = [2.0078 \ 2.0050 \ 2.0023]$  and hyperfine coupling matrix  $a = [16.8$   
5  $16.8 \ 103.7]$  MHz were used. The resulting rotation correlation times are given in supplementary table S1.

**Table S1** rotation correlation times of the investigated labels as simulated in EasySpin

---

| Label          | $t_{\text{corr}} / \text{ns}$ |
|----------------|-------------------------------|
| T54C           | 2.51                          |
| T80C           | 2.51                          |
| T117C          | 4.47                          |
| T179C          | 11.22                         |
| free spinlabel | 0.01                          |

---
